# Supplementary material for: Genetically encoded photocrosslinkers locate the high-affinity binding site of antidepressant drugs in the human serotonin transporter
Source: PubMed Central journal article supplement (PMC4838859; doi:10.1038/ncomms11261), 2016-04-19
Supplement: ncomms11261-s1.pdf [file ncomms11261-s1.pdf]

**a****azF mutants**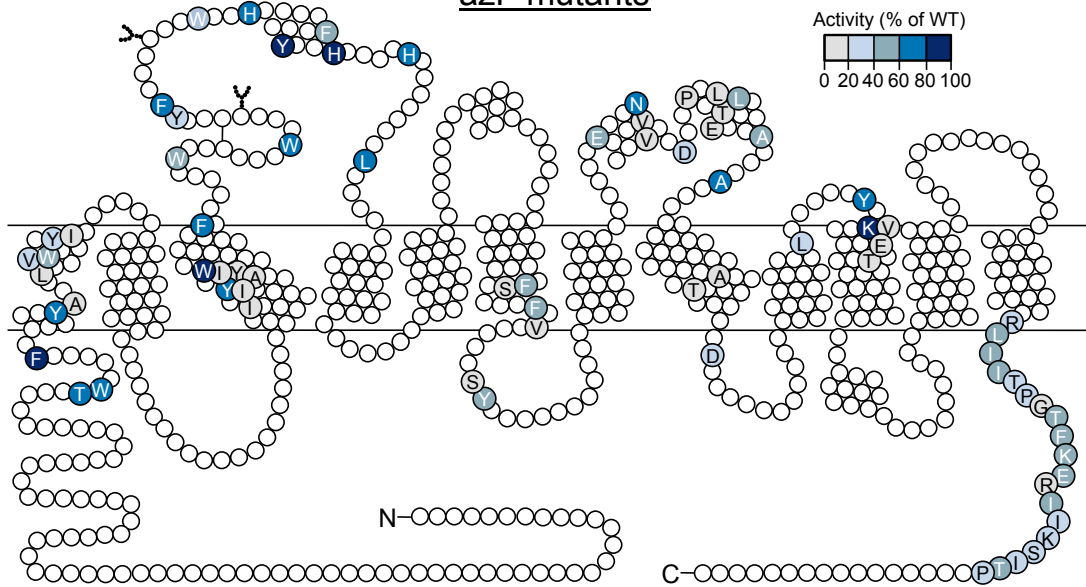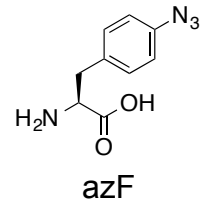**b****BzF mutants**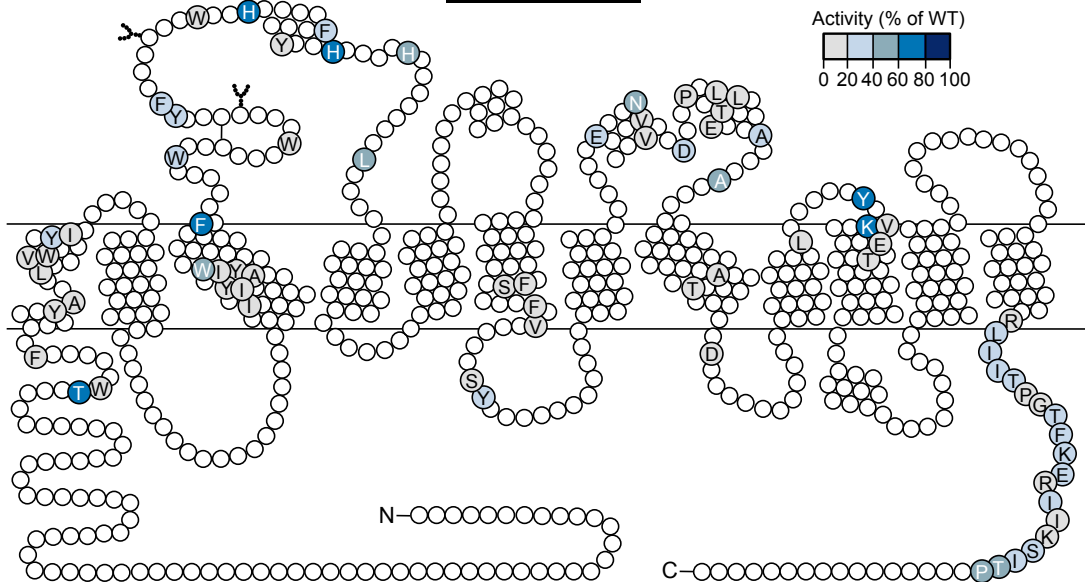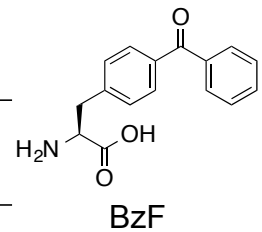

**Supplementary Figure 1: Functional activity of azF and BzF mutants.** Location of azF (a) and BzF (b) mutants plotted onto the 2D topology of human SERT, and color-coded according to their functional activity relative to WT SERT (see **Supplementary Table 1**). The chemical structure of azF and BzF are shown on the right.

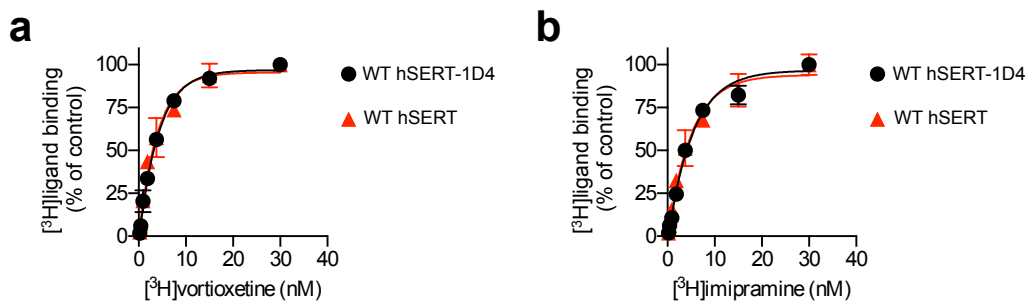

**Supplementary Figure 2: Effect of 1D4 tag on ligand binding.** Saturation binding curves for [<sup>3</sup>H]vortioxetine (**a**) and [<sup>3</sup>H]imipramine (**b**) at WT hSERT and hSERT fused to a 1D4 tag at the C-terminal. The 1D4 tag did not affect the binding affinity ( $K_d$ ) of hSERT to vortioxetine ( $6.1 \pm 1.1$  nM and  $6.3 \pm 0.7$  nM for WT and 1D4-tagged, respectively) or imipramine ( $4.5 \pm 0.7$  nM and  $7.2 \pm 0.8$  nM for WT and 1D4 tagged, respectively).

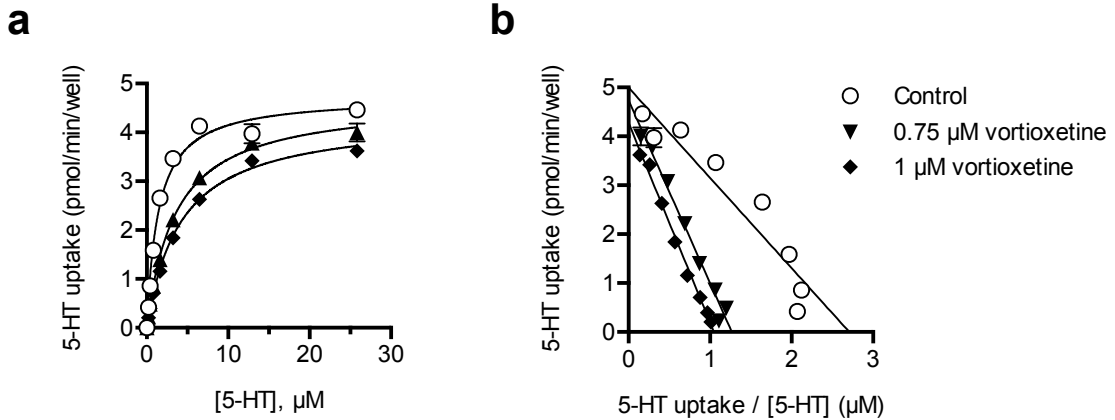

**Supplementary Figure 3: Competitive inhibition of 5-HT transport by vortioxetine.** Substrate  $K_m$  and  $V_{max}$  values for 5-HT uptake into hSERT WT were determined in [ $^3$ H]5-HT saturation uptake assays as described in “Methods”. In paired experiments, the saturation uptake assays were carried out in the absence (control) or in the presence of a fixed concentration (0.75 or 1  $\mu$ M) of vortioxetine. To ensure that 5-HT and vortioxetine had equal access to their binding sites on hSERT, they were added simultaneously in these experiments. (a) 5-HT uptake curves from a representative saturation uptake experiment. Error bars represent s.e.m. and are shown when larger than symbols. The same data are shown in the form of an Eadie-Hofstee plot in (b). The  $K_m$  values (in  $\mu$ M) were  $1.67 \pm 0.12$  for control,  $3.36 \pm 0.23$  for 0.75  $\mu$ M vortioxetine and  $4.68 \pm 0.28$  for 1  $\mu$ M vortioxetine.  $K_m$  values for 0.75 and 1  $\mu$ M vortioxetine were significantly different from control ( $p < 0.05$ ; paired Student’s  $t$ -test).  $V_{max}$  values (in pmol min $^{-1}$  per well) were  $4.21 \pm 0.45$  for control,  $4.19 \pm 0.50$  for 0.75  $\mu$ M vortioxetine and  $4.03 \pm 0.36$  for 1  $\mu$ M vortioxetine.  $V_{max}$  values for 0.75 and 1  $\mu$ M vortioxetine were not significantly different from control ( $p > 0.05$ ; paired Student’s  $t$ -test).  $K_m$  and  $V_{max}$  values are mean  $\pm$  s.e.m. from five experiments each performed in triplicate.

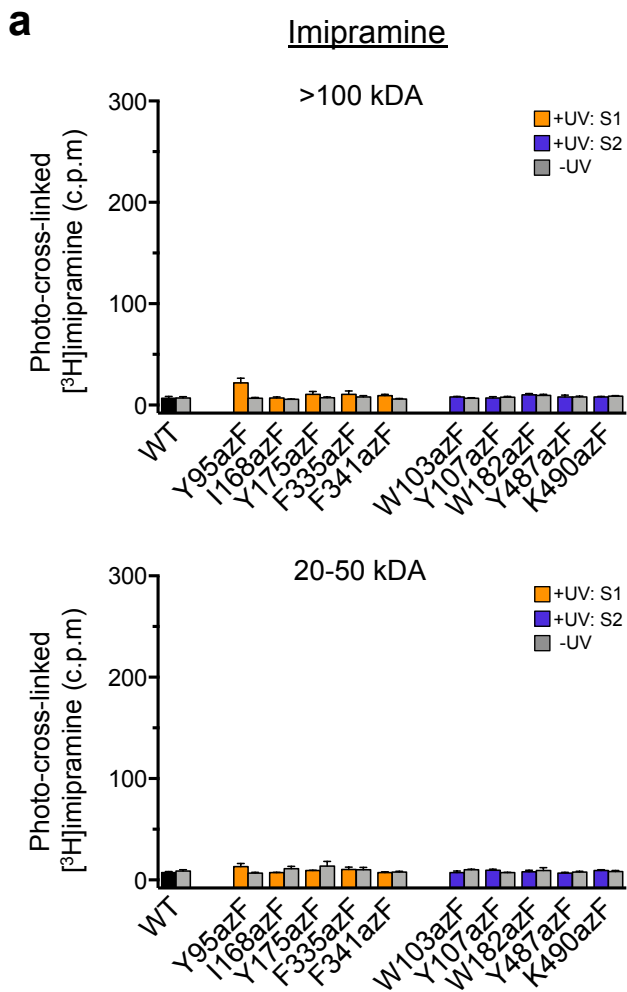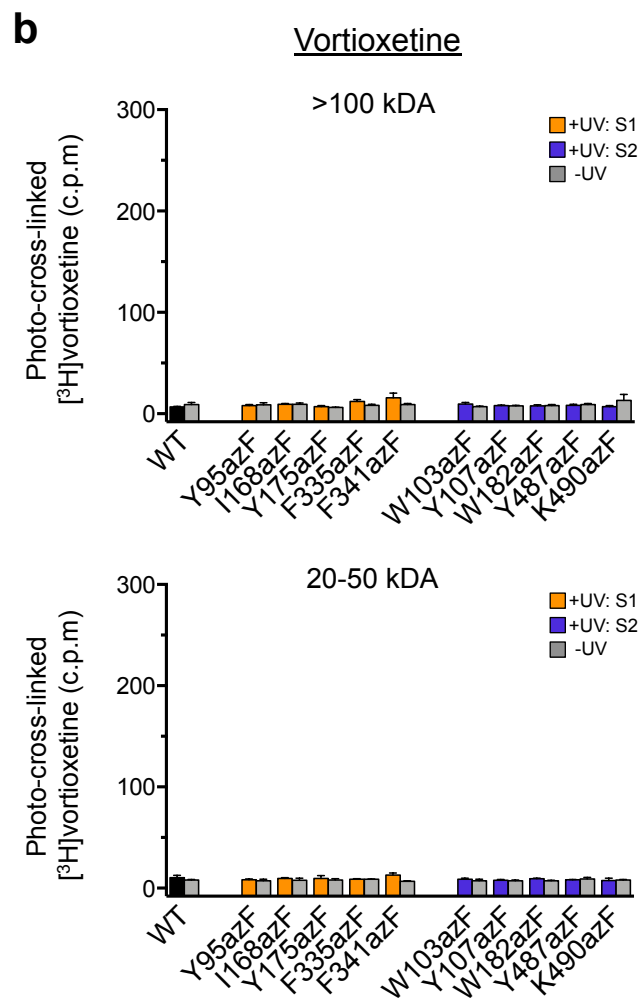

**Supplementary Figure 4: Photo-cross-linking of imipramine and vortioxetine using azF.**

Quantification of radioactivity (c.p.m) on PVDF membrane segments containing protein with the molecular weight of >100 kDa (upper) or 20-50 kDa (lower) from  $[^3\text{H}]$ imipramine (a) and  $[^3\text{H}]$ vortioxetine (b) photo-cross-linking experiments. A radioactive signal indicates a positive cross-link between azF in hSERT and the radiolabelled inhibitor. Data are represented as mean  $\pm$  s.e.m from 3-7 independent experiments.

**a**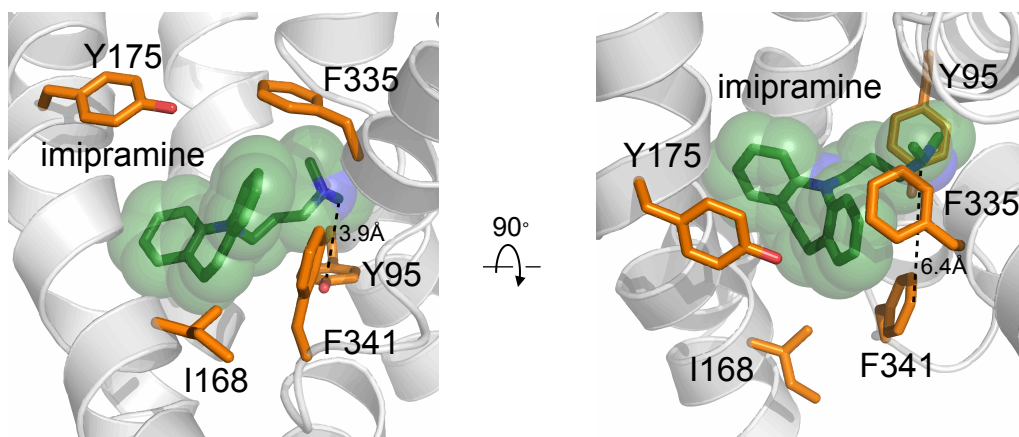**b**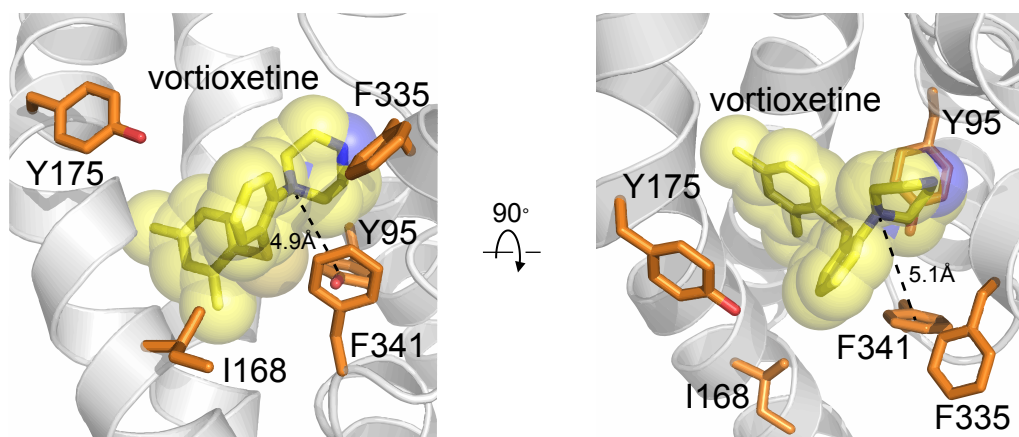

**Supplementary Figure 5: Docking models of imipramine and vortioxetine in hSERT.** Docking models of imipramine<sup>1</sup> (**a**) and vortioxetine<sup>2</sup> (**b**) binding in the S1 site in hSERT (same models as shown in **Fig. 4d** and **Fig. 4e**, respectively). Imipramine is shown in green (**a**), vortioxetine is shown in yellow (**b**) and the five S1 residues that were mutated to azF are shown as orange sticks. The models are shown from within the plane of the membrane (*left*) and from the extracellular side of the membrane (*right*). Distances between the dimethylamino moiety of imipramine and the piperazine ring of vortioxetine to Y95 (*left panels*) and F341 (*right panels*) are indicated on the figure.

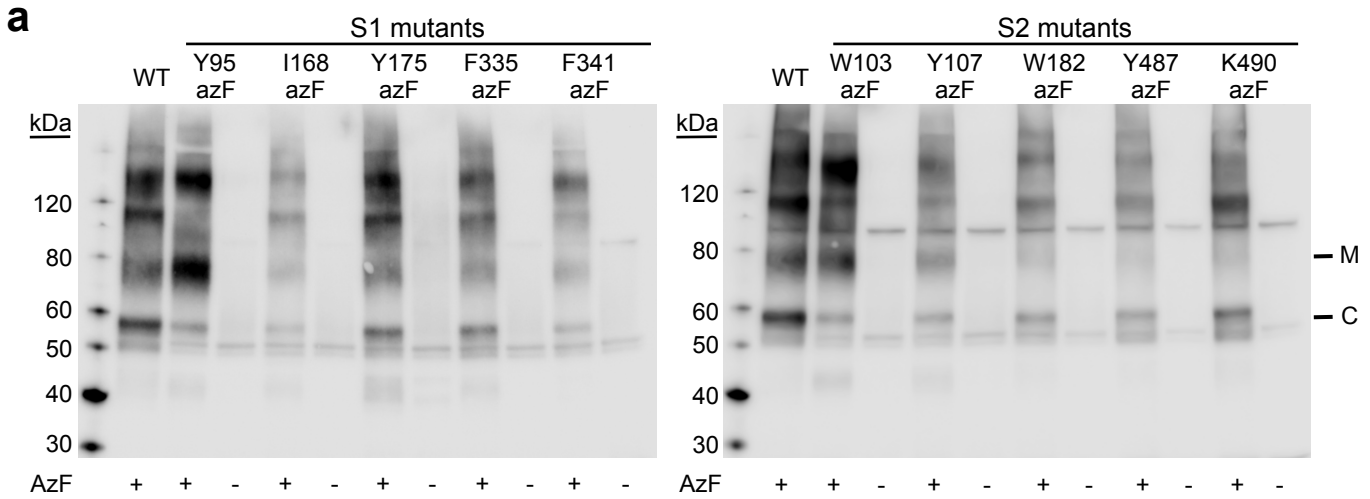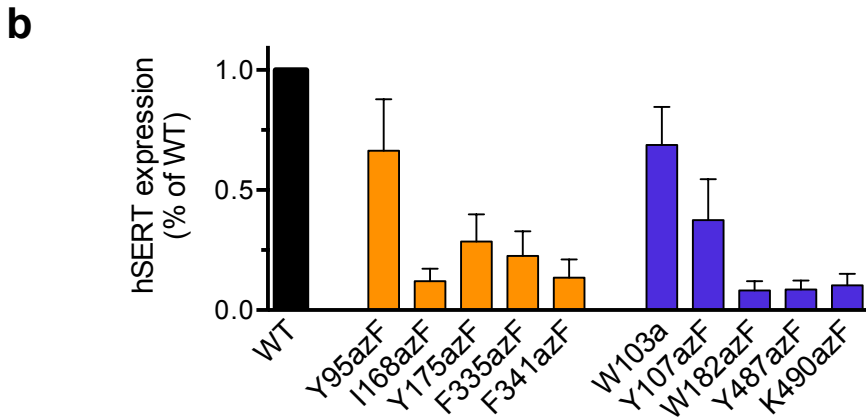

**Supplementary Figure 6: Expression level of hSERT azF mutants.** (a) Immunoblot analysis of immunoprecipitated lysates from HEK293T cells expressing WT hSERT or azF mutants in the presence or absence of azF, using a mAb against a C-terminal 1D4 epitope fused to hSERT (as described in “Methods”). C, core glycosylated hSERT protein; M, mature glycosylated hSERT protein<sup>3</sup>. (b) Expression levels of hSERT azF mutants (in the presence of azF) relative to hSERT WT. Bars represent mean  $\pm$  s.e.m. of quantified expression levels of mature glycosylated hSERT protein from 5-6 independent blots. Bands were quantified with GelQuant software (DNR Bio-Imaging Systems Ltd.)

| Region     | Position          | Transport activity |                | Region     | Position          | Transport activity |                |
|------------|-------------------|--------------------|----------------|------------|-------------------|--------------------|----------------|
|            |                   | azF<br>% of WT     | BzF<br>% of WT |            |                   | azF<br>% of WT     | BzF<br>% of WT |
| N-terminus | T81               | 75 ± 2             | 76 ± 3         |            |                   |                    |                |
| N-terminus | W82 <sup>a</sup>  | 76 ± 3             | 15 ± 1         | EL4        | V397 <sup>b</sup> | NF                 | NF             |
| N-terminus | F88 <sup>a</sup>  | 82 ± 5             | NF             | ● EL4      | D400              | 34 ± 2             | 32 ± 2         |
| ● TM1      | Y95               | 66 ± 1             | NF             | EL4        | P403 <sup>b</sup> | NF                 | NF             |
| ● TM1      | A96               | NF                 | NF             | ● EL4      | L405              | NF                 | NF             |
| ● TM1      | L99               | NF                 | NF             | ● EL4      | L406 <sup>a</sup> | 49 ± 4             | NF             |
| TM1        | V102              | 24 ± 2             | NF             | EL4        | T409 <sup>b</sup> | NF                 | NF             |
| ● TM1      | W103              | 71 ± 2             | 16 ± 1         | EL4        | E412 <sup>b</sup> | 14 ± 3             | 6 ± 3          |
| ● TM1      | Y107              | 21 ± 3             | 20 ± 2         | EL4        | A415 <sup>b</sup> | 54 ± 4             | 22 ± 1         |
| ● TM1      | I108              | NF                 | NF             | EL4        | A419 <sup>a</sup> | 62 ± 2             | 48 ± 8         |
| ● TM3      | I168              | 16 ± 1             | NF             | ● TM8      | T439              | NF                 | NF             |
| ● TM3      | I172              | NF                 | NF             | ● TM8      | A441              | NF                 | NF             |
| ● TM3      | A173              | NF                 | NF             | IL4        | D452 <sup>a</sup> | 27 ± 3             | NF             |
| ● TM3      | Y175              | 69 ± 6             | 15 ± 2         | TM9        | L481 <sup>a</sup> | 57 ± 1             | 13 ± 5         |
| ● TM3      | Y176              | NF                 | NF             | EL5        | Y487              | 80 ± 5             | 62 ± 5         |
| ● TM3      | I179              | NF                 | NF             | ● TM10     | V489 <sup>a</sup> | NF                 | NF             |
| ● TM3      | W182              | 85 ± 7             | 49 ± 3         | ● TM10     | K490              | 82 ± 4             | 60 ± 1         |
| TM3        | F191              | 77 ± 4             | 67 ± 7         | ● TM10     | E493 <sup>a</sup> | NF                 | NF             |
| EL2        | W197              | 56 ± 4             | 29 ± 4         | ● TM10     | T497              | NF                 | NF             |
| EL2        | W204              | 74 ± 3             | 11 ± 1         | C-terminus | R596              | 29 ± 2             | 13 ± 2         |
| EL2        | Y212              | 37 ± 4             | 26 ± 4         | C-terminus | L597              | 46 ± 4             | 26 ± 3         |
| EL2        | F213              | 66 ± 2             | 39 ± 5         | C-terminus | I598              | 43 ± 8             | 21 ± 7         |
| EL2        | W220              | 48 ± 4             | 11 ± 1         | C-terminus | I599              | 43 ± 7             | 29 ± 5         |
| EL2        | H223              | 78 ± 3             | 67 ± 6         | C-terminus | T600              | 37 ± 5             | 21 ± 5         |
| EL2        | F231              | 59 ± 3             | 28 ± 8         | C-terminus | P601              | 21 ± 6             | 13 ± 4         |
| EL2        | Y232              | 82 ± 2             | 11 ± 2         | C-terminus | G602              | 6 ± 2              | 8 ± 1          |
| EL2        | H235              | 83 ± 3             | 62 ± 3         | C-terminus | T603              | 42 ± 6             | 29 ± 6         |
| EL2        | H240              | 68 ± 4             | 58 ± 5         | C-terminus | F604              | 47 ± 7             | 31 ± 5         |
| EL2        | L248              | 70 ± 3             | 59 ± 3         | C-terminus | K605              | 47 ± 5             | 29 ± 6         |
| ● TM6      | F335              | 50 ± 5             | NF             | C-terminus | E606              | 47 ± 1             | 39 ± 2         |
| ● TM6      | S336              | NF                 | NF             | C-terminus | R607              | 15 ± 5             | 8 ± 1          |
| ● TM6      | F341              | 56 ± 3             | NF             | C-terminus | I608              | 46 ± 4             | 30 ± 5         |
| ● TM6      | V343              | NF                 | NF             | C-terminus | I609              | 32 ± 3             | 17 ± 3         |
| TM6        | S349 <sup>a</sup> | NF                 | NF             | C-terminus | K610              | 27 ± 1             | 18 ± 3         |
| IL3        | Y350 <sup>a</sup> | 51 ± 4             | 20 ± 4         | C-terminus | S611              | 29 ± 4             | 23 ± 5         |
| EL4        | E388 <sup>b</sup> | 51 ± 7             | 37 ± 5         | C-terminus | I612              | 38 ± 3             | 28 ± 2         |
| EL4        | N391 <sup>b</sup> | 65 ± 15            | 51 ± 13        | C-terminus | T613              | 49 ± 4             | 47 ± 1         |
| EL4        | V394 <sup>b</sup> | NF                 | NF             | C-terminus | P614              | 37 ± 3             | 49 ± 3         |

<sup>a</sup>C-terminally fused to GFP<sup>2</sup>. <sup>b</sup>C-terminally fused to 6 x His tag. ● S1 site. ● S2 site.

**Supplementary Table 1. Transport activity of azF and BzF mutants.** Transport activities were determined in a [<sup>3</sup>H]5-HT uptake assay as described under “Methods”. Unless otherwise noted, the transporter protein was C-terminally fused to a 1D4 tag. Results are presented as mean ± s.e.m. from two to six independent experiments each performed in triplicate. TM = transmembrane helix, EL = extracellular loop, NF = non-functional (≤ 5% of WT).

| Residue type/location | Number of mutants | Functional mutants |          |
|-----------------------|-------------------|--------------------|----------|
|                       |                   | azF                | BzF      |
| Total                 | 75                | 55 (73%)           | 47 (63%) |
| Aromatic              | 23                | 22 (96%)           | 18 (78%) |
| Termini               | 22                | 22 (100%)          | 21 (95%) |
| Loop                  | 28                | 22 (79%)           | 21 (75%) |
| TM                    | 25                | 12 (44%)           | 5 (20%)  |

**Supplementary Table 2. Transport activities of azF and BzF mutant according to residue type and location in hSERT.**

|                   | $K_m$        | $V_{max}^a$ | $K_i$ (vortioxetine) | $K_i$ (imipramine) |
|-------------------|--------------|-------------|----------------------|--------------------|
|                   | $\mu M$      | % of WT     | nM                   | nM                 |
| SERT WT           | 2.24 ± 0.25  |             | 202 ± 19             | 98 ± 16            |
| <b>S1 mutants</b> |              |             |                      |                    |
| Y95azF            | 1.17 ± 0.12* | 36 ± 2      | 1245 ± 125*          | 2091 ± 120*        |
| I168azF           | 0.44 ± 0.08* | 2 ± 0.3     | 19 ± 3*              | 3 ± 0.6*           |
| Y175azF           | 0.44 ± 0.08* | 10 ± 1      | 53 ± 6*              | 12 ± 2*            |
| F335azF           | 0.17 ± 0.03* | 3 ± 0.4     | 54 ± 9*              | 34 ± 6*            |
| F341azF           | 0.40 ± 0.07* | 9 ± 0.8     | 43 ± 5*              | 79 ± 6             |
| <b>S2 mutants</b> |              |             |                      |                    |
| W103azF           | 1.47 ± 0.21* | 38 ± 4      | 149 ± 12             | 55 ± 5             |
| Y107azF           | 0.61 ± 0.13* | 2 ± 0.5     | 38 ± 9*              | 8 ± 0.3*           |
| W182azF           | 0.66 ± 0.10* | 16 ± 1      | 74 ± 9*              | 17 ± 2*            |
| Y487azF           | 0.48 ± 0.07* | 10 ± 0.6    | 96 ± 16*             | 27 ± 3*            |
| K490azF           | 0.18 ± 0.03* | 5 ± 0.3     | 56 ± 20*             | 14 ± 3*            |

**Supplementary Table 3. Impact of azF mutants on transport kinetics and inhibitory potency of vortioxetine and imipramine.** Substrate  $K_m$  and  $V_{max}$  values and inhibitor  $K_i$  values were determined in [<sup>3</sup>H]5-HT uptake assays as described in "Methods". Results are presented as mean ± s.e.m. from 3–11 independent experiments each performed in triplicate. Asterisks (\*) denote significantly different  $K_m$  or  $K_i$  value compared to SERT WT ( $p < 0.05$ ; Student's  $t$ -test).

<sup>a</sup>  $V_{max}$  is expressed as percentage of SERT WT determined in parallel. For SERT WT,  $V_{max}$  (mean ± s.e.m.) was 4.09 ± 0.82 pmol min<sup>-1</sup> per well ( $n = 11$ ).



### Supplementary References

1. Sinning, S. *et al.* Binding and orientation of tricyclic antidepressants within the central substrate site of the human serotonin transporter. *J. Biol. Chem.* **285**, 8363-8374 (2010).
2. Andersen, J. *et al.* Binding of the multimodal antidepressant drug vortioxetine to the human serotonin transporter. *ACS Chem. Neurosci.* **6**, 1892-1900 (2015).
3. Koban, F. *et al.* A salt bridge linking the first intracellular loop with the C terminus facilitates the folding of the serotonin transporter. *J. Biol. Chem.* **290**, 13263-13278 (2015).
